# Supplementary material for: Effectiveness of Early Direct Oral Anticoagulant Monotherapy within One Year of Coronary Stent Implantation in Patients with Atrial Fibrillation: A Nationwide Population-Based Study
Source: MDPI journal article supplement (doi:10.3390/jcm12237487), 2023-12-04
Supplement: s1 [file s1]

Supplemental Table S1. Definitions of baseline covariates

| Diagnosis                      | ICD-10-CM code or prescription code                                                                                                                                                                                                                 | Diagnostic definition                                |
|--------------------------------|-----------------------------------------------------------------------------------------------------------------------------------------------------------------------------------------------------------------------------------------------------|------------------------------------------------------|
| <b>Atrial fibrillation</b>     | I48                                                                                                                                                                                                                                                 | Admission $\geq$ 1 or outpatient department $\geq$ 2 |
| <b>Hypertension</b>            | I10-I13, I15                                                                                                                                                                                                                                        | Admission $\geq$ 1 or outpatient department $\geq$ 2 |
| <b>Diabetes mellitus</b>       | E10-E14                                                                                                                                                                                                                                             | Admission $\geq$ 1 or outpatient department $\geq$ 2 |
| <b>Heart failure</b>           | I11.0, I13.0, I13.2, I42, I50                                                                                                                                                                                                                       | Admission $\geq$ 1 or outpatient department $\geq$ 2 |
| <b>Chronic kidney disease</b>  | I12, I13, N00-05, N07, N11, N14, N17-19, Z49, Q61                                                                                                                                                                                                   | Admission or outpatient department $\geq$ 1          |
| <b>End-stage renal disease</b> | N185, Z49                                                                                                                                                                                                                                           | Admission or outpatient department $\geq$ 1          |
| <b>Liver cirrhosis</b>         | K74, K702, K703, K717, K761                                                                                                                                                                                                                         | Admission or outpatient department $\geq$ 1          |
| <b>Myocardial infarction</b>   | I21, I22, I23                                                                                                                                                                                                                                       | Admission $\geq$ 1 or outpatient department $\geq$ 2 |
| <b>Ischemic stroke</b>         | I63, I64                                                                                                                                                                                                                                            | Admission $\geq$ 1 or outpatient department $\geq$ 2 |
| <b>Intracranial hemorrhage</b> | I60-62                                                                                                                                                                                                                                              | Admission $\geq$ 1 or outpatient department $\geq$ 2 |
| <b>GI bleeding</b>             | I85.0, K22.1, K22.8, K25.0, K25.2, K25.4, K25.6, K26.0, K26.2, K26.4, K26.6, K27.0, K27.2, K27.4, K27.6, K28.0, K28.2, K28.4, K28.6, K29.0, K31.8, K55.2, K57.0, K57.1, K57.2, K57.3, K57.4, K57.5, K57.8, K57.9, K62.5, K66.1, K92.0, K92.1, K92.2 | Admission $\geq$ 1 or outpatient department $\geq$ 2 |
| <b>PCI</b>                     | M6561, M6562, M6563, M6564, M6565, M6566                                                                                                                                                                                                            | Operation codes                                      |
| <b>CABG</b>                    | O1640, O1641, O1645, O1646, O1647, O1648, O1649                                                                                                                                                                                                     | Operation codes                                      |
| <b>DOAC dose</b>               |                                                                                                                                                                                                                                                     |                                                      |
| <b>Low dose</b>                |                                                                                                                                                                                                                                                     | Dabigatran 110mg, rivaroxaban                        |

|                           |                                                                                                                                                                                                                                                                                                                                                                                  |                                                                    |
|---------------------------|----------------------------------------------------------------------------------------------------------------------------------------------------------------------------------------------------------------------------------------------------------------------------------------------------------------------------------------------------------------------------------|--------------------------------------------------------------------|
|                           |                                                                                                                                                                                                                                                                                                                                                                                  | 10mg/15mg, apixaban 2.5mg, or edoxaban 15mg/30mg                   |
| <b>Standard dose</b>      |                                                                                                                                                                                                                                                                                                                                                                                  | Dabigatran 150mg, rivaroxaban 20mg, apixaban 5mg, or edoxaban 60mg |
| <b>Drug-eluting stent</b> | J5083001, J5083002, J5083011, J5083029, J5083040, J5083046, J5083070, J5083101, J5083137, J5083140, J5083173, J5083201, J5083213, J5083237, J5083240, J5083273, J5083301, J5083401, J5083501, J5231221, J5231294, J8083033, J8083089, J8083129, J8083340, J8083440, J8083473, J5231306, J5231045, J5231065, J5083006, J5083013, J5083042, J5083073, J5083113, J8083073, J8083373 | Material codes at the time of PCI                                  |

---

GI = gastrointestinal; PCI = percutaneous coronary intervention; CABG = coronary artery bypass graft; DOAC = direct oral anticoagulant.

Supplemental Table S2. Definitions of study outcomes

| Outcomes                        | ICD-10-CM code                                                                                                                                     | Diagnostic definition                                                                                         |
|---------------------------------|----------------------------------------------------------------------------------------------------------------------------------------------------|---------------------------------------------------------------------------------------------------------------|
| <b>MACE</b>                     |                                                                                                                                                    | A composite event of cardiovascular death, myocardial infarction, ischemic stroke or systemic thromboembolism |
| <b>Cardiovascular death*</b>    | I00.X-I99.X or R96, R98, R99                                                                                                                       | Recorded as a major cause of death                                                                            |
| <b>Myocardial infarction</b>    | I21, I22, I23                                                                                                                                      | Major diagnosis for admission during the study period                                                         |
| <b>Ischemic stroke</b>          | I63, I64                                                                                                                                           | Major diagnosis for admission during the study period                                                         |
| <b>Systemic thromboembolism</b> | I74, I26, I80.2                                                                                                                                    | Major diagnosis for admission during the study period                                                         |
| <b>Major bleeding</b>           |                                                                                                                                                    | Major diagnosis of ICH, GI bleeding or other critical area bleeding for admission during the study period     |
| <b>ICH</b>                      | I60-62                                                                                                                                             | Major diagnosis for admission during the study period                                                         |
| <b>GI bleeding</b>              | I85.0, K22.1, K22.8, K25.0, K25.2, K25.4, K25.6, K26.0, K26.2, K26.4, K26.6, K27.0, K27.2, K27.4, K27.6, K28.0, K28.2, K28.4, K28.6, K29.0, K31.8, | Major diagnosis for admission during the study period                                                         |

|                                              |                                                                                                     |                                                                                                                                     |
|----------------------------------------------|-----------------------------------------------------------------------------------------------------|-------------------------------------------------------------------------------------------------------------------------------------|
|                                              | K55.2, K57.0, K57.1, K57.2, K57.3, K57.4, K57.5,<br>K57.8, K57.9, K62.5, K66.1, K92.0, K92.1, K92.2 |                                                                                                                                     |
| <b>Other critical area bleeding</b>          | D62, H05.2, H35.6, H43.1, J94.2, M25.0, I312, I319                                                  | Major diagnosis for admission during the study period                                                                               |
| <b>Any critical anatomical site bleeding</b> |                                                                                                     | New diagnosis of ICH, GI bleeding or other critical area bleeding for either admission or outpatient visit, during the study period |

---

\*Causes of deaths were identified by the data provided from the Korean national statistical office.

MACE = major adverse cardiovascular event; ICH = intracranial hemorrhage; GI = gastrointestinal.
